# Supplementary material for: Tolerogenic Immunomodulation by PEGylated Antigenic Peptides
Source: PubMed Central journal article supplement (PMC7581722; doi:10.3389/fimmu.2020.529035), 2020-10-09
Supplement: DataSheet_1.pdf [file DataSheet_1.pdf]

## Supplementary Material

### pOVA-PEG (linear)

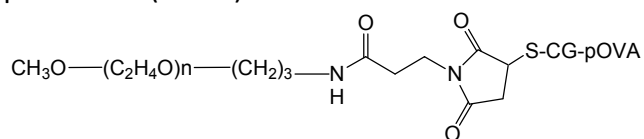

$n = \text{approx. } 450 \text{ or } 900$

### pOVA-PEG (tetramer)

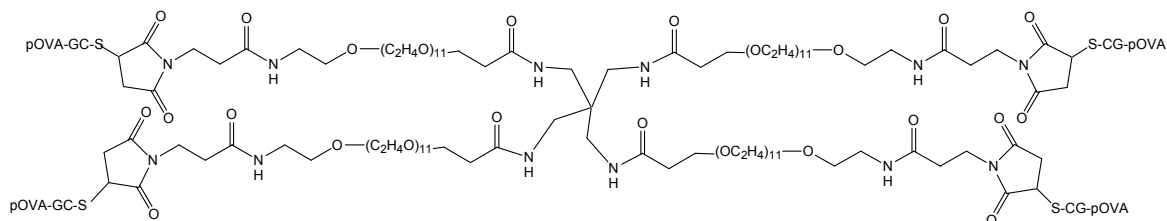

### pMOG-PEG

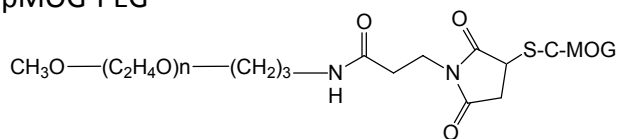

$n = \text{approx. } 450$

## Supplementary Figure 1:

**Formulas of PEG-peptide conjugates used.**

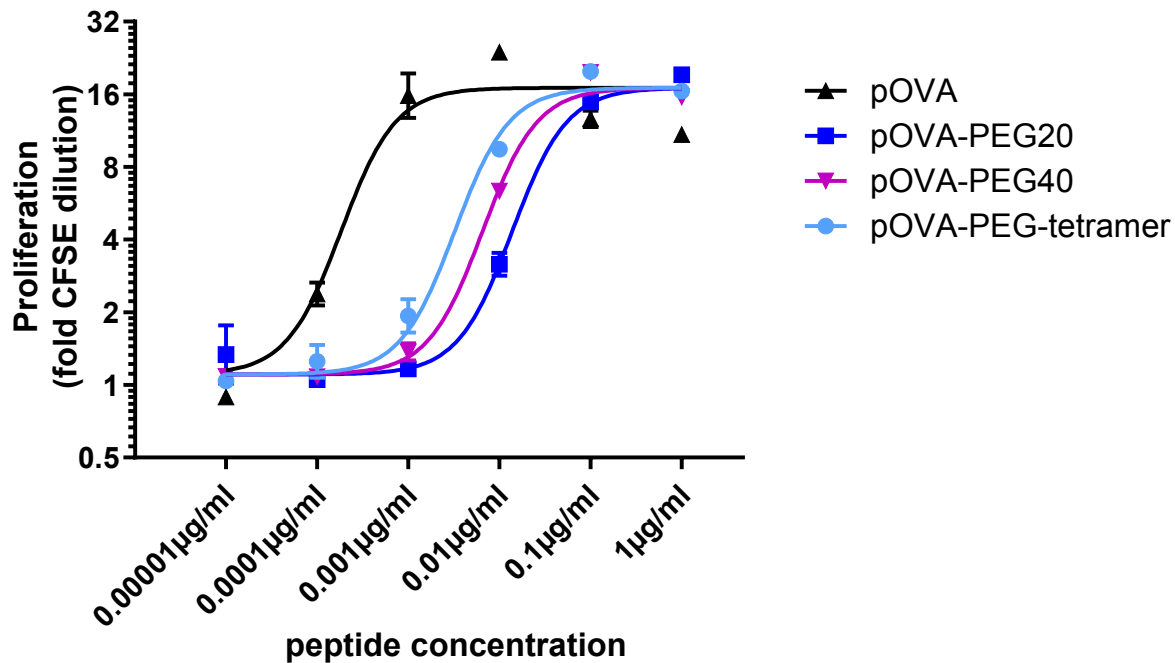

Supplementary Figure 2

### Stimulatory capacity of PEGylated peptides *in vitro*: Fitted dose-response curves of peptide and conjugates.

Higher concentrations of PEGylated peptides were required to induce half-maximal proliferation compared to unmodified pOVA with 21 to 91-fold higher effective concentration (EC<sub>50</sub>).

EC<sub>50</sub> pOVA-PEG20: 91.0 (fold EC<sub>50</sub> of pOVA); 95% confidence interval (CI): 26.0-156.0;

EC<sub>50</sub> pOVA-PEG40: 43.9; CI: 11.4-76.4;

EC<sub>50</sub> pOVA-PEG-tetramer: 21.0; CI: 5.4-36.7).

Dose-response analysis was performed using GraphPad Prism version 7. EC<sub>50</sub> shift was estimated by global nonlinear fitting of the default Hill model, assuming same minimal and maximal proliferation and variable Hill-slope for each conjugate. The number of cell divisions, that is log<sub>2</sub> of the dilution factor of CFSE, was used as the proliferation output. Statistical differences between the EC<sub>50</sub> values of the conjugates were computed applying the sum-of-squares F-Test for the unconstrained model and EC<sub>50</sub> shift of 1. All dose-response curves were significantly different from each other with  $p < 0.001$ .

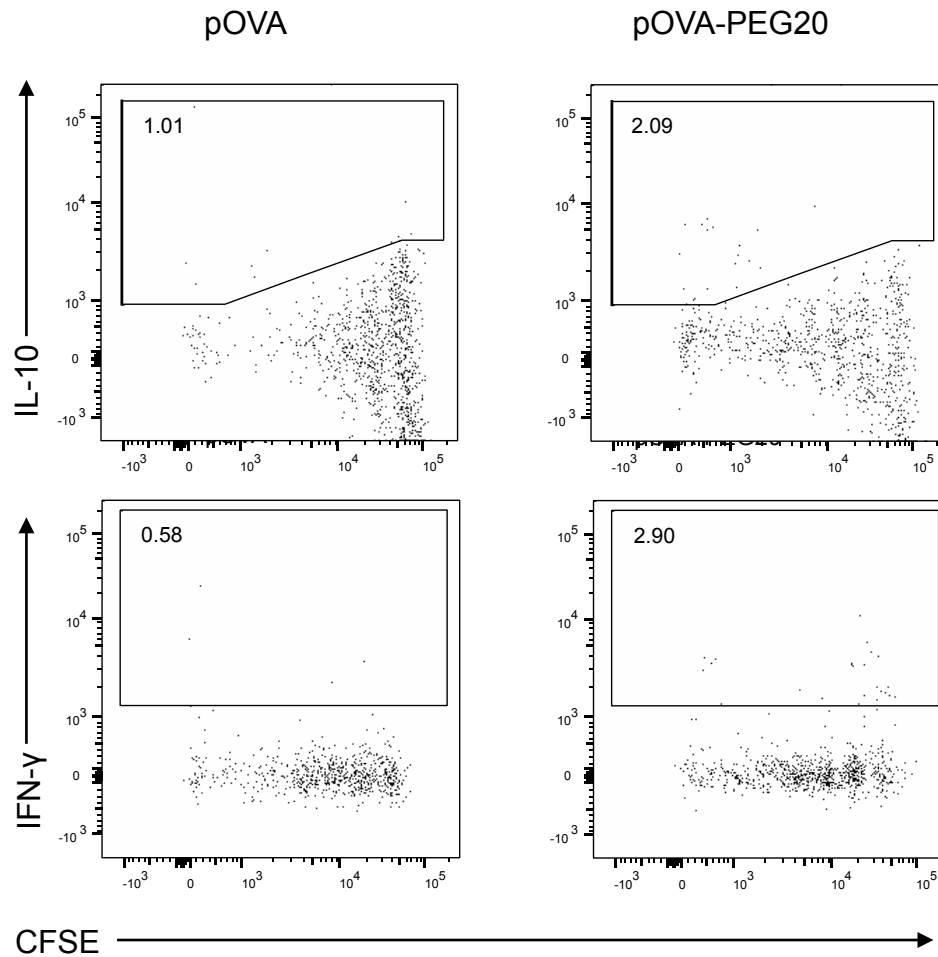

**Supplementary Figure 3**

**Representative IL10 and IFN $\gamma$  staining (after restimulation) upon stimulation with 5  $\mu$ g pOVA and pOVA-PEG20 *in vivo*; day 7.**

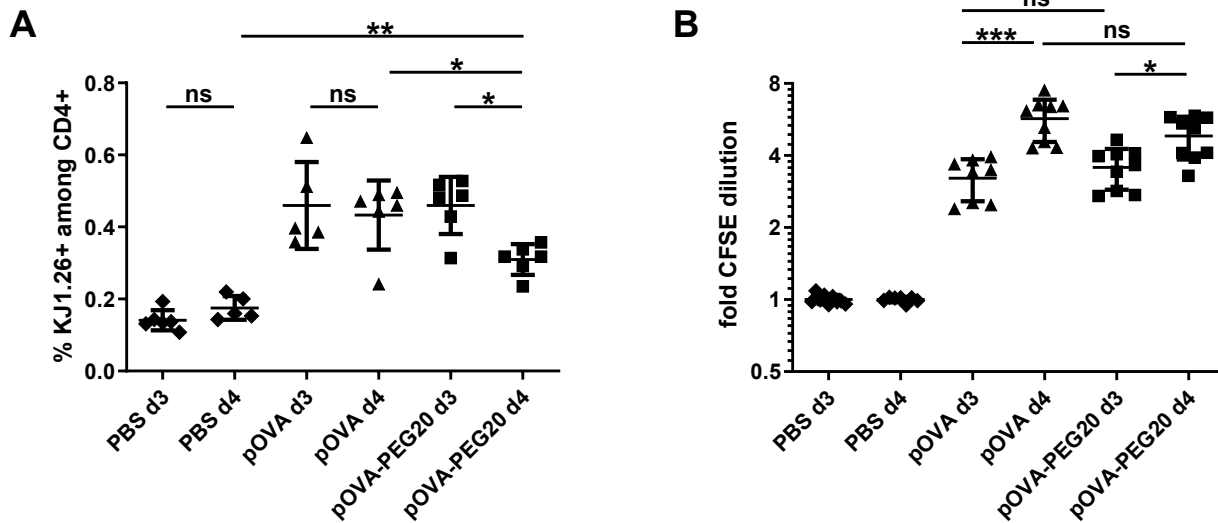

Supplementary Figure 4:

**Faster decline in the number of OVA-specific CD4<sup>+</sup> T cells following pOVA-PEG20 after day 3, despite ongoing proliferation.**

24 h after adoptive transfer of OVA-specific CFSE-labeled CD4<sup>+</sup> T cells, recipients received *i.v.* PBS (control), 5  $\mu$ g pOVA or equimolar amounts of pOVA-PEG20. Splenocytes were isolated on day 3 (d3) and day 4 (d4) and analyzed using flow cytometry. (A) % KJ1.26<sup>+</sup> cells (OVA-specific T cells) among total CD4<sup>+</sup> cells. Mean  $\pm$  SD of (n = 6). One representative of two independent experiments is shown. (B) Proliferation (mean x-fold CFSE dilution  $\pm$  SD) of OVA-specific CD4<sup>+</sup> T cells. Data from two independent experiments, n = 7-9. Statistical testing was performed using the nonparametric Mann Whitney test and Holm-Bonferroni correction for multiple comparisons.

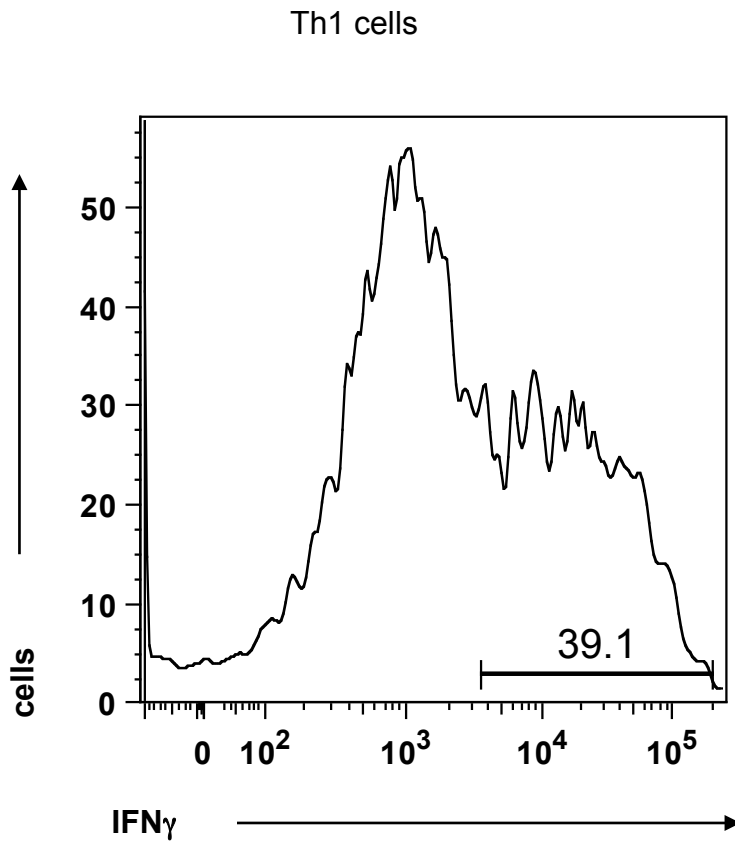

**Supplementary Figure 5:**

**Impact of pOVA-PEG20 vaccination in presence of pre-existing T effector cells.**

Representative histogram of IFN- $\gamma$  expression of *in vitro* generated OVA-specific Th1 cells on day 5 of culture before adoptive transfer.

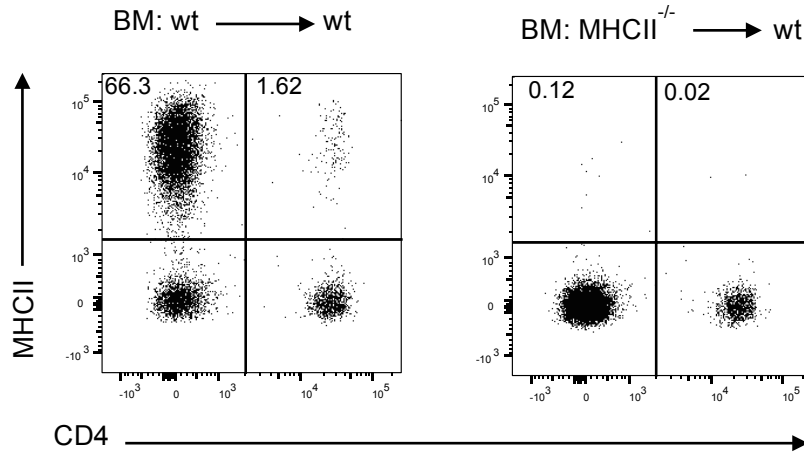**Supplementary Figure 6:**

**Control staining of blood leucocytes for MHCII, 8 weeks after reconstitution of BM-depleted B6 mice with BM from MHCII<sup>-/-</sup> mice.**

## B cells

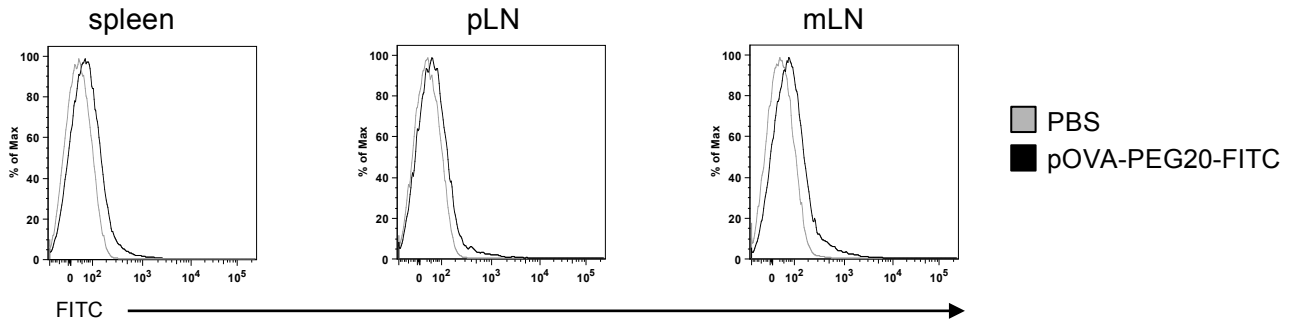

## DCs

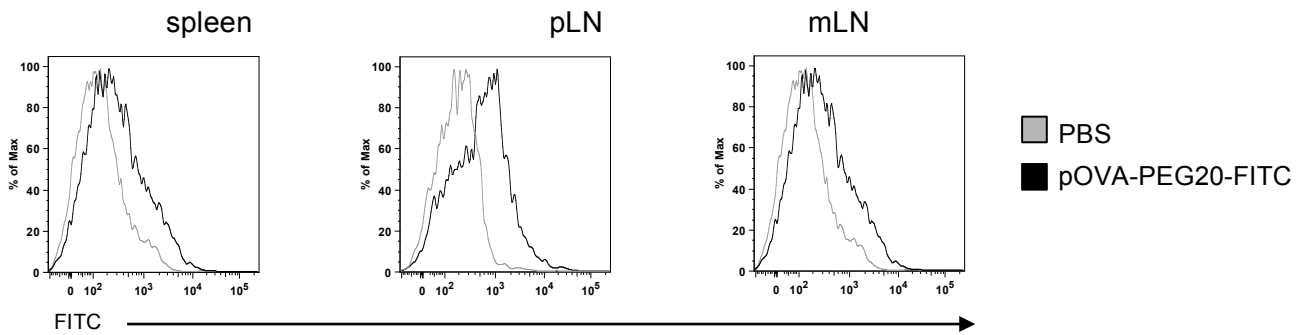

## macrophages

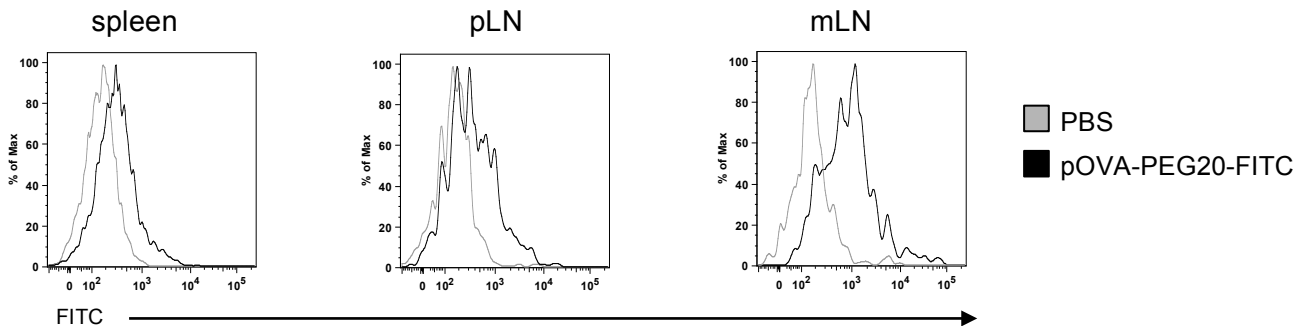

### Supplementary Figure 7:

#### **Uptake of pOVA-PEG20 by different hematopoietic APC subsets.**

Mice received PBS (grey) or 100  $\mu$ g (based on peptide amount) pOVA-PEG20 (black) conjugated to FITC *i.v.*. After one hour mice were sacrificed and secondary lymphoid organs were isolated. Cells were stained with surface markers and analyzed flow cytometry. APC populations were characterized as follows: B cells (CD19<sup>+</sup>), DCs (CD11c<sup>+</sup>) and macrophages (CD11c<sup>-</sup> CD11b<sup>+</sup>). Representative histograms of FITC-intensity. Representative data from two independent experiments.

B cells

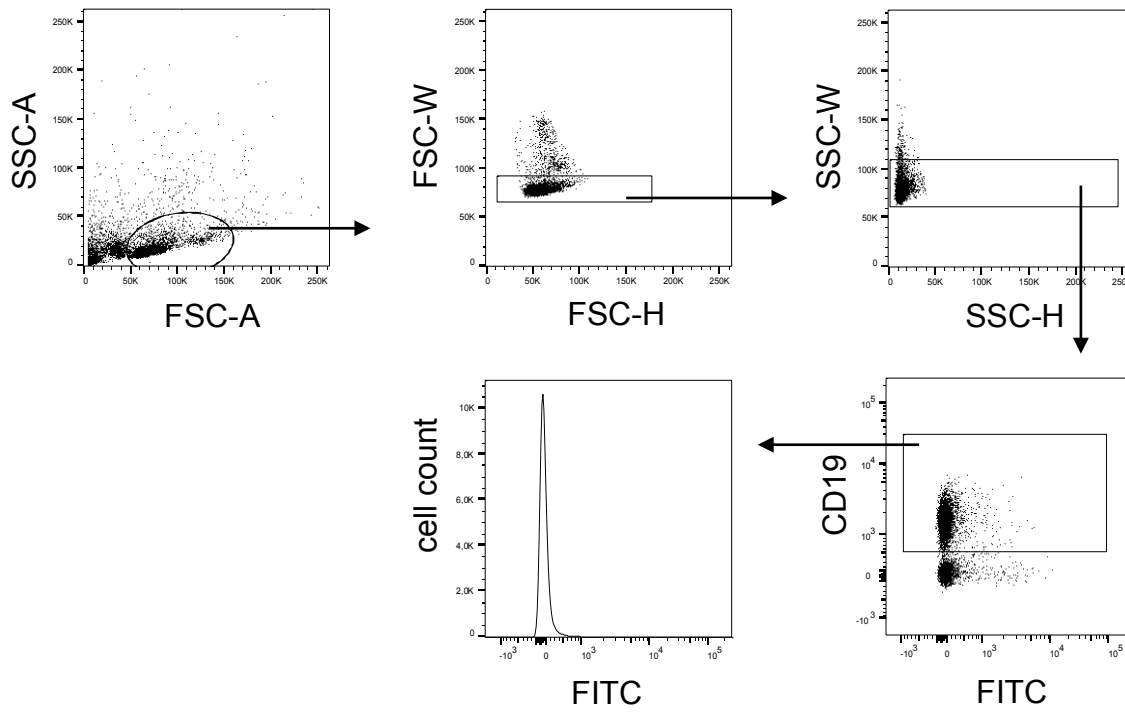

DCs

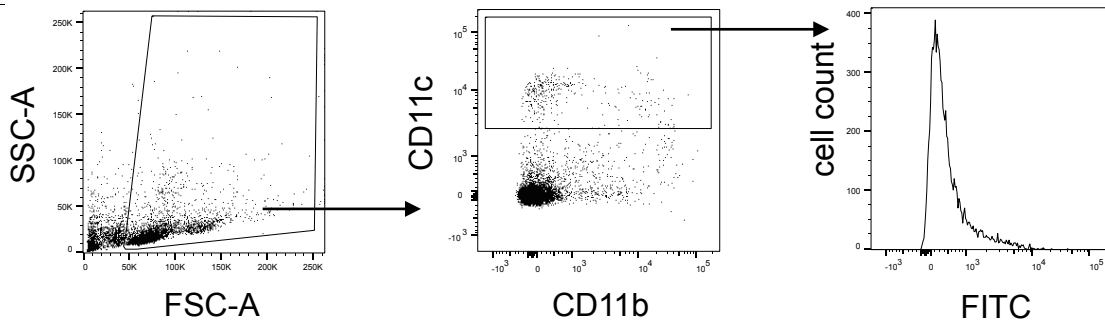

Macrophages

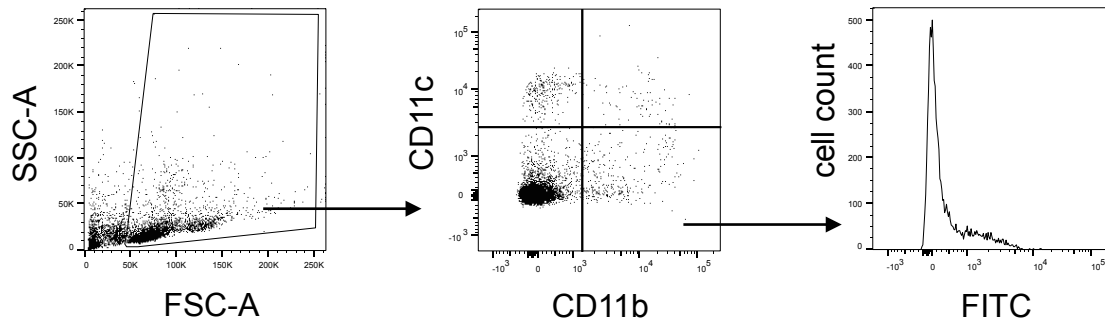

**Supplementary Figure 8**  
**Gating strategy for the identification of cells taking up pOVA-PEG20-FITC**
